# Supplementary material
Source: PubMed Central journal article supplement (PMC8256921)
Supplement: NIHMS1718286-supplement-Supplemental.pdf [file NIHMS1718286-supplement-Supplemental.pdf]

Appendix Figure 1. Co-occurrence of social stressor indicators among transgender veterans (n=6,308).

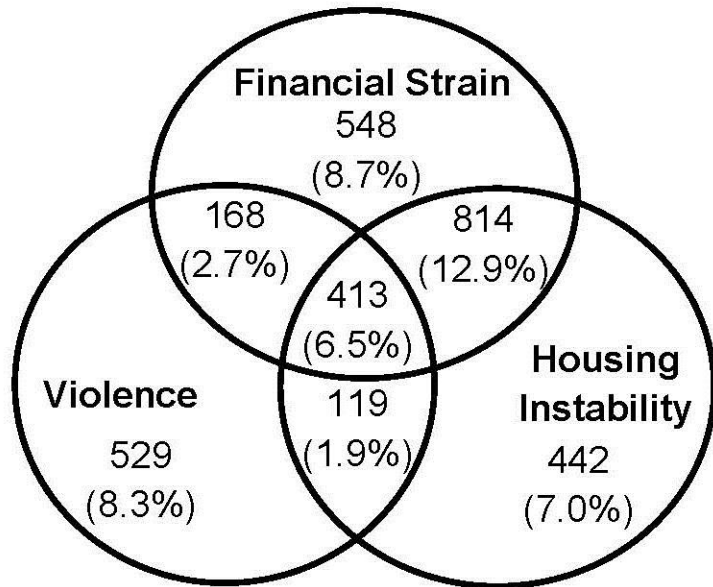

Appendix  
Impact of Social Determinants of Health on Medical Conditions Among Transgender Veterans  
Blosnich et al.

Appendix Figure 2. Associations of types of social stressors with medical conditions among transgender veterans.

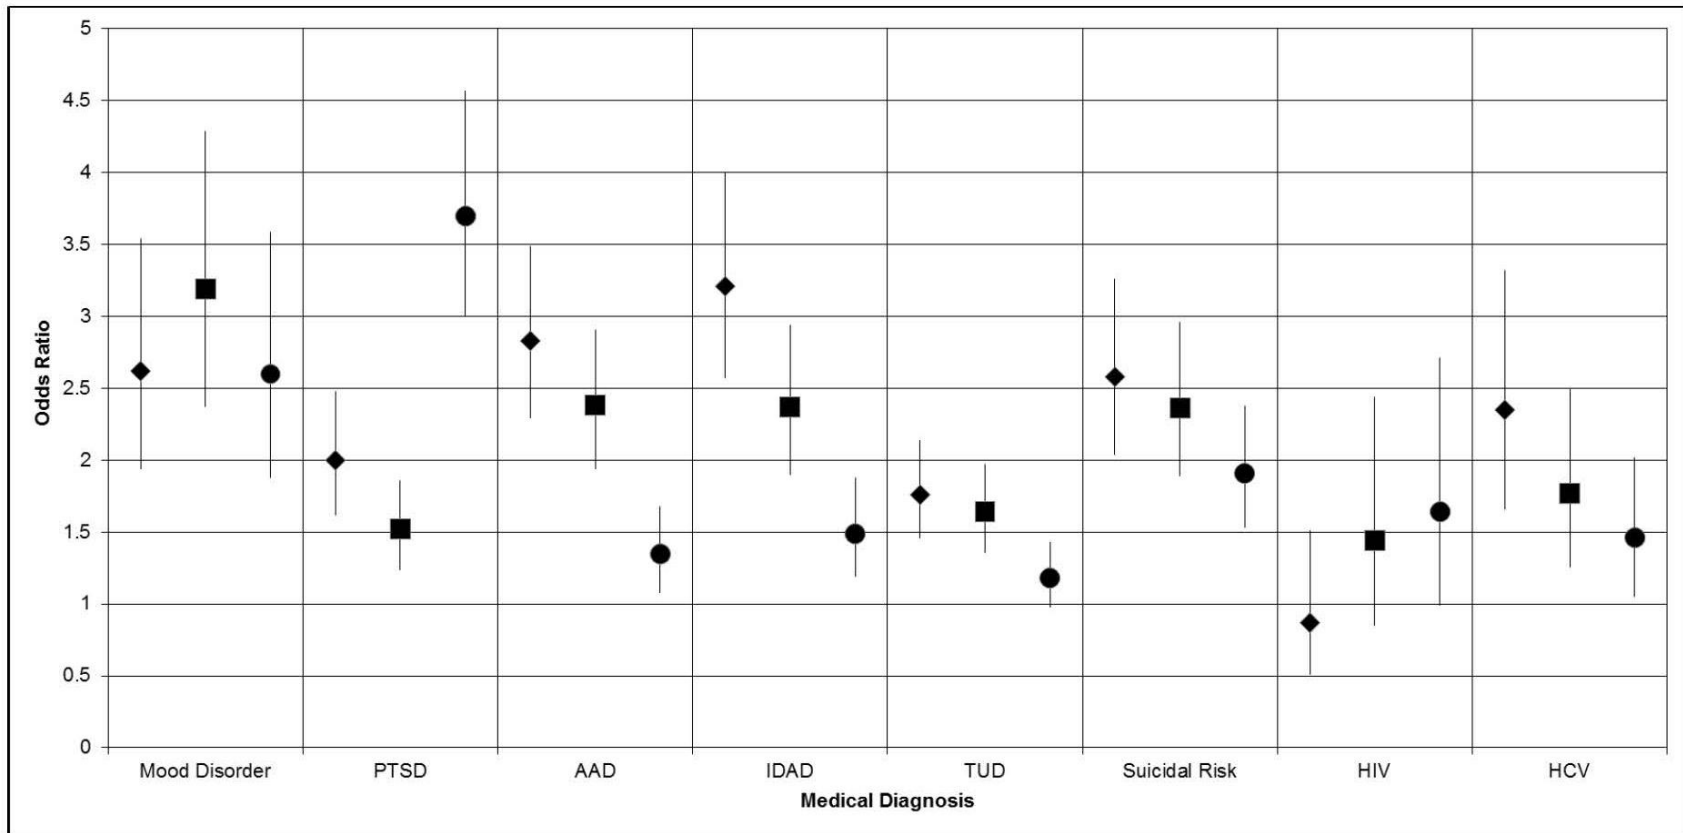

◆=Housing instability; ■ = Financial instability; ● = Violence

PTSD, post-traumatic stress disorder; AAD, alcohol abuse disorder; IDAD, illicit drug abuse disorder; TUD, tobacco use disorder; HCV, hepatitis C virus

**Appendix**  
**Impact of Social Determinants of Health on Medical Conditions Among Transgender Veterans**  
**Blosnich et al.**

**Appendix A. ICD-9 Diagnosis Codes and Prevalence of Each Code**

| ICD-9 Diagnosis Codes                                                     | n     | %      |
|---------------------------------------------------------------------------|-------|--------|
| Housing instability                                                       |       |        |
| V60.0 Lack of housing                                                     | 1,643 | (26.1) |
| V60.1 Housing instability                                                 | 560   | (8.9)  |
| VA Homelessness clinical screen                                           | 107   | (1.8)  |
| Financial strain                                                          |       |        |
| V60.2 Inadequate material resources                                       | 1,375 | (21.8) |
| V62.0 Unemployment                                                        | 1,163 | (18.4) |
| Violence                                                                  |       |        |
| V71.5-6 Observation following an alleged rape or other inflicted injury   | 19    | (0.3)  |
| V15.4-9 History of physical/emotional abuse, other psychological trauma   | 234   | (3.7)  |
| 995.80-995.85 Adult maltreatment                                          | 279   | (4.4)  |
| E960-969 Assault                                                          | 165   | (2.6)  |
| VA military sexual trauma clinical screen <sup>a</sup>                    | 938   | (14.9) |
| HIV                                                                       |       |        |
| 042 HIV                                                                   | 175   | (2.8)  |
| Hepatitis C                                                               |       |        |
| 070.41 Acute hepatitis C with hepatic coma                                | 9     | (0.1)  |
| 070.44 Chronic hepatitis C with hepatic coma                              | 14    | (0.2)  |
| 070.51 Acute hepatitis C without mention of hepatic coma                  | 367   | (5.8)  |
| 070.54 Chronic hepatitis C without hepatic coma                           | 349   | (5.5)  |
| 070.70 unspecified viral hepatitis C without hepatic coma                 | 198   | (3.1)  |
| V02.62 carrier or suspected carrier of hepatitis C                        | 51    | (0.8)  |
| Suicidal ideation or attempt                                              |       |        |
| V62.84 Suicidal ideation                                                  | 870   | (13.8) |
| E950-9 Suicide and self-inflicted injury                                  | 447   | (7.1)  |
| E980-9 Injury undetermined whether accidentally or purposefully inflicted | 122   | (1.9)  |
| Posttraumatic stress disorder                                             |       |        |
| 309.81 Post-traumatic stress disorder                                     | 2,571 | (40.8) |
| Tobacco use                                                               |       |        |
| 305.1 Tobacco use disorder                                                | 2,759 | (43.7) |
| V15.82 History of tobacco use                                             | 726   | (11.5) |
| Illicit drug abuse disorder                                               |       |        |
| 304 Drug dependence                                                       | 1,356 | (21.5) |
| Alcohol abuse disorder                                                    |       |        |
| 303 Alcohol dependence syndrome                                           | 1,656 | (26.2) |
| Mood disorders                                                            |       |        |
| 296 Episodic mood disorders                                               | 3,769 | (59.8) |
| 311 Depressive disorder, not elsewhere classified                         | 4,350 | (68.9) |

<sup>a</sup>Screen is: *While you were in the military: (a) Did you receive uninvited and unwanted sexual attention, such as touching, cornering, pressure for sexual favors, or verbal remarks?; (b) Did someone ever use force or threat of force to have sexual contact with you against your will?*
